# Supplementary material for: Impact of Light Stress on the Synthesis of Both Antioxidants Polyphenols and Carotenoids, as Fast Photoprotective Response in Chlamydomonas reinhardtii: New Prospective for Biotechnological Potential of This Microalga
Source: MDPI journal article supplement (doi:10.3390/sym13112220), 2021-11-20
Supplement: s1 [file s1]

**Table S1.** Results of the main test of PERMANOVA: values of the Pseudo-F variables and relative p-values. Significant p-values are indicated in bold. Pseudo-F's subscripts indicate the degrees of freedom. \*: car: carotenoids extracts; poly: polyphenolic extracts.

| Parameter                      | Pseudo-F <sub>9,11</sub>      | p-Value        |
|--------------------------------|-------------------------------|----------------|
| <b>Extracts</b>                |                               |                |
| <i>Carotenoids</i>             |                               |                |
| Neoxanthin                     | 1.14                          | 0.3707         |
| Loroxanthin                    | 65.18                         | <b>0.0051</b>  |
| Violaxanthin                   | 7.76                          | <b>0.0087</b>  |
| Antheraxanthin                 | 9.52                          | <b>0.0115</b>  |
| Zeaxanthin                     | 209.46                        | <b>0.0039</b>  |
| Lutein                         | 4.88                          | <b>0.0287</b>  |
| Cis-lutein                     | 0.53                          | 0.6083         |
| $\alpha$ -carotene             | 5.12                          | <b>0.0411</b>  |
| $\beta$ -carotene              | 16.52                         | <b>0.0062</b>  |
| <i>Chlorophylls</i>            |                               |                |
| Chlorophyll a                  | 0.22                          | 0.8406         |
| Chlorophyll b                  | 1.03                          | 0.4058         |
| Chlorophyll a+b                | 0.09                          | 0.9022         |
| Chlorophyll a/b                | 19.61                         | <b>0.0277</b>  |
| <i>Polyphenols</i>             |                               |                |
| Gallic acid                    | 134.16                        | <b>0.0003</b>  |
| Chlorogenic acid               | 13.68                         | <b>0.0006</b>  |
| Coumaric acid                  | 54.19                         | <b>0.0004</b>  |
| <i>Antioxydant properties*</i> |                               |                |
| DPPH car                       | 216.88                        | <b>0.0034</b>  |
| DPPH poly                      | 137.28                        | <b>0.0001</b>  |
| ORAC car                       | 1034.5                        | <b>0.0004</b>  |
| ORAC poly                      | 8.17                          | <b>0.0092</b>  |
|                                | <b>Pseudo-F<sub>6,8</sub></b> | <b>p-value</b> |
| <b>Cultures</b>                |                               |                |
| <i>Biomass analysis</i>        |                               |                |
| Chlorophyll a                  | 0.75                          | 0.6721         |
| Chlorophyll b                  | 64.28                         | <b>0.0075</b>  |
| Chlorophyll a+b                | 94.08                         | <b>0.0288</b>  |
| Dry Weight                     | 200.16                        | <b>0.0184</b>  |
| Total carotenoids              | 194.74                        | <b>0.0023</b>  |
| <i>JIP test parameters</i>     |                               |                |
| Mo                             | 346.1                         | <b>0.003</b>   |
| V <sub>J</sub>                 | 910.1                         | <b>0.0036</b>  |
| F <sub>v</sub> /F <sub>m</sub> | 4379.8                        | <b>0.0039</b>  |
| $\psi_o$                       | 704.43                        | <b>0.0039</b>  |
| $\varphi_{Eo}$                 | 650.68                        | <b>0.0038</b>  |
